# Supplementary material for: Optimal Definitions for Abdominal Obesity and the Metabolic Syndrome in Andean Hispanics: The PREVENCION Study
Source: PubMed Central journal article supplement — Diabetes Care. 2010 Mar 3;33(6):1385–8. doi: 10.2337/dc09-2353 (PMC2875461; doi:10.2337/dc09-2353), 2010-03-03
Supplement: supp_dc09-2353_onlineappendix.pdf [file supp_dc09-2353_onlineappendix.pdf]

**Table A1. Mean age of study participants and age-standardized\* population estimates (and 95% confidence intervals) for important demographic, clinical and laboratory characteristics of the study population**

|                                                      | <b>Men<br/>(n=687)</b> | <b>Women<br/>(n=761)</b> |
|------------------------------------------------------|------------------------|--------------------------|
| <b>Age, years</b>                                    | 52.7 (51.4-53.9)       | 52.1 (51.0-53.3)         |
| <b>Current Smoking (%)†</b>                          | 30.1 (26.1-34.1)       | 13.6 (10.7-16.5)         |
| <b>Current alcohol consumption (%)†</b>              | 56.6 (52.3-60.9)       | 22.1 (18.4-25.8)         |
| <b>Body Height, cm †</b>                             | 169.8 (169.1-170.4)    | 156.6 (156.1-157.1)      |
| <b>Body Weight, Kg †</b>                             | 76.2 (75.0-77.3)       | 63.0 (62.0-63.9)         |
| <b>Body Mass Index, kg/m<sup>2</sup> †</b>           | 26.4 (26.0-26.7)       | 25.7 (25.4-26.1)         |
| <b>Waist Circumference, cm †</b>                     | 93.0 (92.2-93.8)       | 84.9 (84.0-85.7)         |
| <b>Waist-to-height Ratio</b>                         | 0.548 (0.544 - 0.553)  | 0.544 (0.538 - 0.549)    |
| <b>Current use of hormonal contraceptives (%)</b>    | ---                    | 7.2 (4.8-9.5)            |
| <b>Current use of hormone-replacement therapy(%)</b> | ---                    | 2.8 (1.8-3.8)            |
| <b>Systolic Blood Pressure, mmHg †</b>               | 115.6 (114.6-116.7)    | 113.4 (112.3-114.4)      |
| <b>Diastolic Blood Pressure, mmHg †</b>              | 77.5 (76.8-78.2)       | 74.9 (74.2-75.6)         |
| <b>Total Cholesterol, mg/dL</b>                      | 194.6 (191.4-197.9)    | 197.2 (194.4-200.1)      |
| <b>HDL Cholesterol, mg/dL †</b>                      | 45.5 (44.7-46.2)       | 48.7 (48.0-49.5)         |
| <b>LDL Cholesterol, mg/dL</b>                        | 115.2 (112.5-117.9)    | 117.2 (115.0-119.3)      |
| <b>Triglycerides, mg/dL †</b>                        | 185.6 (177.9-193.3)    | 141.9 (136.8-146.9)      |
| <b>Impaired fasting glucose (%) † ‡</b>              | 4.1 (2.4-5.7)          | 2.4 (1.6-3.3)            |
| <b>Diabetes mellitus (%)</b>                         | 4.5 (3.0-5.9)          | 4.1 (2.7-5.5)            |

\*According to the World Health Organization estimates on standard world population (2000-2025).

† $P < 0.001$  for difference between men and women. ‡ Impaired fasting glucose was defined as fasting blood glucose between 100-125 mg/dL; diabetes mellitus was defined as fasting blood glucose  $\geq 126$ mg/dL or antidiabetic pharmacologic treatment.

HDL= High density lipoprotein; LDL=Low density lipoprotein.

**Table A2. Areas under receiver-operator characteristic (ROC) curves and optimal waist circumference cut-points in men and women to detect elevated cIMT or manifest CVD in the study population**

|                                 | <b>Elevated cIMT,<br/>age-specific cutoff</b> | <b>Elevated cIMT,<br/>age-independent<br/>cutoff</b> | <b>Manifest<br/>CVD</b> |
|---------------------------------|-----------------------------------------------|------------------------------------------------------|-------------------------|
| <b>Area Under the ROC curve</b> |                                               |                                                      |                         |
| Men                             | 0.61                                          | 0.59                                                 | 0.67                    |
| Women                           | 0.58                                          | 0.65                                                 | 0.70                    |
| <b>Optimal Cutoff Points</b>    |                                               |                                                      |                         |
| Men                             | 96                                            | 99                                                   | 96                      |
| Women                           | 86                                            | 86                                                   | 89                      |
| <b>Sensitivity</b>              |                                               |                                                      |                         |
| Men                             | 64.5                                          | 52.4                                                 | 68.7                    |
| Women                           | 67.8                                          | 74.2                                                 | 70.7                    |
| <b>Specificity</b>              |                                               |                                                      |                         |
| Men                             | 56.9                                          | 66.9                                                 | 58.1                    |
| Women                           | 47.0                                          | 49.4                                                 | 57.1                    |

**Table A3. Prevalence of the Metabolic Syndrome according to the original AHA/NHLBI and the updated metabolic syndrome definitions in men and women of different age groups. 95% confidence intervals are shown in parentheses.**

|                                     | Men                           |                     |                    | Women                         |                     |                    |
|-------------------------------------|-------------------------------|---------------------|--------------------|-------------------------------|---------------------|--------------------|
|                                     | Original AHA/NHLBI Definition | Updated Definition* | $\kappa$ Statistic | Original AHA/NHLBI Definition | Updated Definition* | $\kappa$ Statistic |
| <b>Overall (age-standardized) †</b> | 17.3 (14.2-20.4)              | 21.7 (18.4-25.2)    | 0.85               | 24.0 (21.1-26.9)              | 25.3 (22.2-28.3)    | 0.99               |
| <b>Age 20-34 years</b>              | 6.5 (1.9-11.1)                | 10.7 (5.3-16.1)     | 0.72               | 6.1 (2.4-9.7)                 | 7.4 (3.0-11.7)      | 0.95               |
| <b>Age 35-49 years</b>              | 20.5 (13.4-27.7)              | 23.1 (15.7-30.5)    | 0.92               | 22.9 (16.2-29.6)              | 24.3 (17.6-31.2)    | 0.95               |
| <b>Age 50-64 years</b>              | 27.1 (21.0-33.3)              | 33.2 (26.7-39.6)    | 0.86               | 40.2 (34.0-46.4)              | 41.6 (35.3-47.8)    | 0.97               |
| <b>Age 65-80 years</b>              | 25.8 (19.2-32.4)              | 33.8 (26.5-41.0)    | 0.82               | 57.3 (49.5-65.2)              | 57.3 (49.5-65.2)    | 1.00               |

\* The WC-cut-point among men was >97 cm. The WC cut-point among women was >87 cm.

† According to the World Health Organization standard world population (2000-2005).
